# Supplementary material for: Ablation of tau causes an olfactory deficit in a murine model of Parkinson’s disease
Source: PubMed Central journal article supplement (PMC6032546; doi:10.1186/s40478-018-0560-y), 2018-07-05
Supplement: 40478_2018_560_MOESM1_ESM.pdf [file 40478_2018_560_MOESM1_ESM.pdf]

## **Additional file 1**

|               | <b>Sex</b>    | <b>WT (n=)</b> | <b>Tau<sup>-/-</sup> (n=)</b> |
|---------------|---------------|----------------|-------------------------------|
| 7 months old  | <i>Male</i>   | 6              | 7                             |
|               | <i>Female</i> | 6              | 4                             |
| 12 months old | <i>Male</i>   | 10             | 8                             |
|               | <i>Female</i> | 2              | 4                             |
| 15 months old | <i>Male</i>   | 5              | 7                             |
|               | <i>Female</i> | 3              | 6                             |

**Table S1.** Animal number breakdown based on genotype and sex.

| <b>Experimental Group</b> | <b>Analysis</b> | <b>Parameter 1 Factor: genotype</b> | <b>Parameter 2 Factor: odour concentration</b> | <b>Parameter 3: interaction</b> |
|---------------------------|-----------------|-------------------------------------|------------------------------------------------|---------------------------------|
| 7 mo Sv129B/6             | 2-way RM ANOVA  | $F_{1,57}=11, p=0.003$              | $F_{3,57}=5.3, p=0.003$                        | $F_{1,57}=2.2, p=0.01$          |
| 12 mo Sv129B/6            | 2-way RM ANOVA  | $F_{1,99}=7.9, p=0.008$             | $F_{3,99}=6.3, p<0.001$                        | $F_{3,99}=1.7, p=0.2$           |
| 15 mo Sv129B/6            | 2-way RM ANOVA  | $F_{1,66}=0.39, p=0.54$             | $F_{3,66}=0.55, p=0.65$                        | $F_{3,66}=1.01, p=0.4$          |

**Table S2.** ODT ANOVA factors. Normality test: Shapiro-Wilk

| <b>Experimental Group</b> | <b>Odour concentration</b> | <b>Hypothetical mean</b> | <b>Actual mean</b> | <b>SEM</b> | <b>n</b> | <b>p</b> |
|---------------------------|----------------------------|--------------------------|--------------------|------------|----------|----------|
| 7 mo WT                   | 0                          | 50                       | 49.46              | 3.67       | 11       | 0.88     |
|                           | 1:10 <sup>8</sup>          | 50                       | 62.13              | 6.743      | 12       | 0.10     |
|                           | 1:10 <sup>6</sup>          | 50                       | 68.39              | 3.672      | 10       | 0.0007   |
|                           | 1:10 <sup>4</sup>          | 50                       | 72.89              | 3.613      | 10       | 0.0001   |
| 7 mo tau <sup>-/-</sup>   | 0                          | 50                       | 45.04              | 2.53       | 10       | 0.08     |
|                           | 1:10 <sup>8</sup>          | 50                       | 58.91              | 3.343      | 10       | 0.03     |
|                           | 1:10 <sup>6</sup>          | 50                       | 46.79              | 5.355      | 11       | 0.56     |
|                           | 1:10 <sup>4</sup>          | 50                       | 56.67              | 6.396      | 11       | 0.32     |
| 15 mo WT                  | 0                          | 50                       | 51.40              | 2.785      | 8        | 0.63     |
|                           | 1:10 <sup>8</sup>          | 50                       | 51.81              | 3.96       | 8        | 0.66     |
|                           | 1:10 <sup>6</sup>          | 50                       | 54.76              | 4.06       | 7        | 0.29     |
|                           | 1:10 <sup>4</sup>          | 50                       | 59.56              | 5.41       | 5        | 0.15     |
| 15 mo tau <sup>-/-</sup>  | 0                          | 50                       | 48.78              | 5.27       | 12       | 0.82     |
|                           | 1:10 <sup>8</sup>          | 50                       | 58.73              | 4.41       | 10       | 0.08     |
|                           | 1:10 <sup>6</sup>          | 50                       | 52.15              | 4.27       | 12       | 0.63     |
|                           | 1:10 <sup>4</sup>          | 50                       | 49.79              | 4.18       | 11       | 0.96     |

**Table S3.** ODT one sample t test, hypothetical mean = 50% (chance).

A

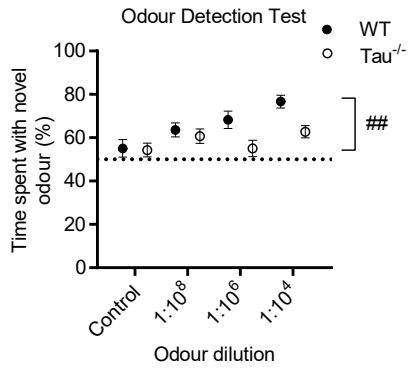

B

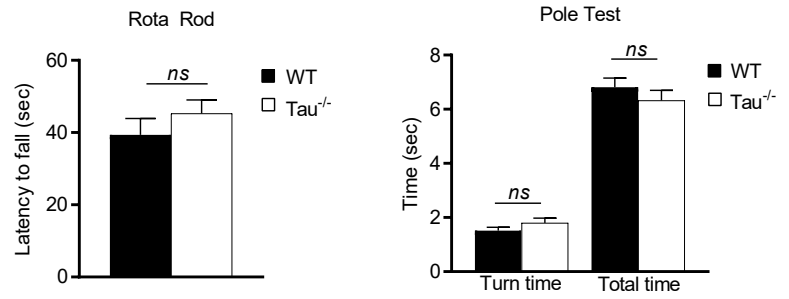

**Figure S1.** Odour detection test (A) and motor evaluation (B) (Rota Rod and Pole Test) of 12-month-old tau<sup>-/-</sup> (n=12) and littermate WT control (n=12). ODT analysed by two-way repeated measures ANOVA (one factor repetition) with Fisher LSD post-hoc comparisons. # represents significant main effect of genotype, ## p < 0.01. Motor tests analysed by unpaired two-sided t test. Ns = not significant.

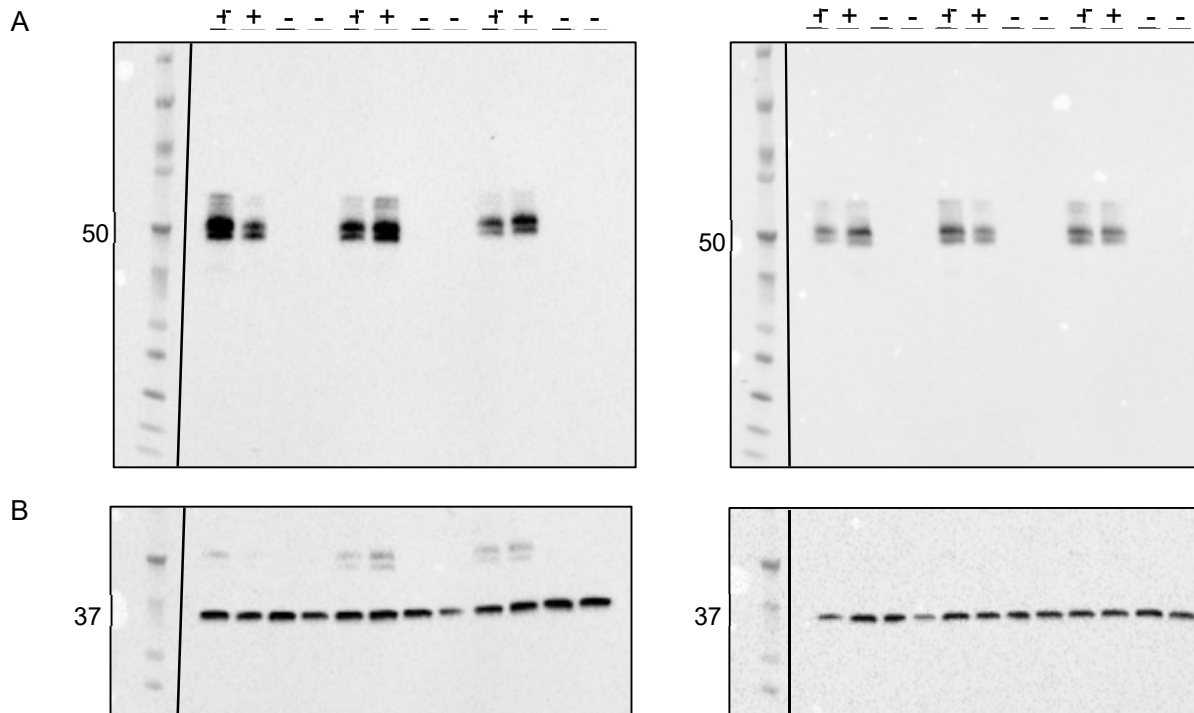

**Figure S2.** Western blot confirmation of tau ablation in 7- and 15-month old tissue used for immunoblot analysis. A) Tau antibody (Dako, catalogue number: A0024, dilution 1:10,000) confirmed tau ablation B) Protein loading in all wells confirmed by GAPDH (Cell Signaling Technology, catalogue number 2118, dilution 1:10,000).

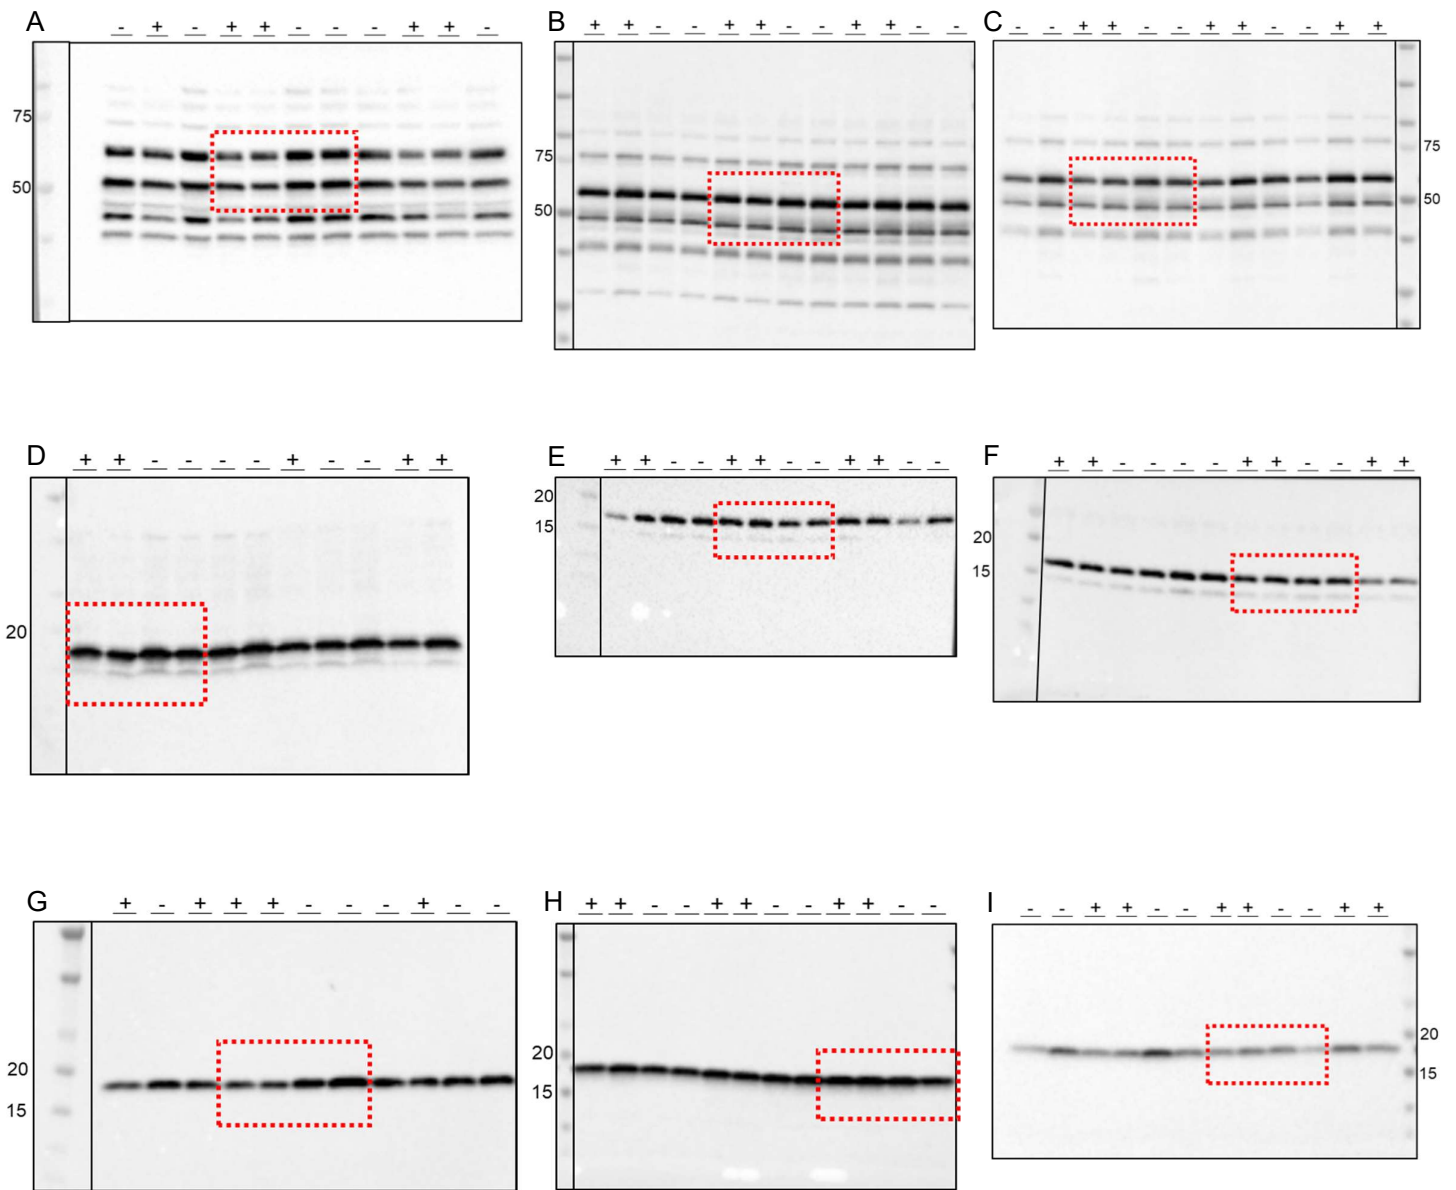

**Figure S3.** Full Western Blots of 7 mo WT (+) and  $Tau^{-/-}$  (-) cell lysate. A, B, C: immunoblot of p62 from OB, CPU and SN respectively. D, E, F: immunoblot of LCB3 from OB, CPU and SN respectively. G, H, I: immunoblot of  $\alpha$ -synuclein from OB, CPU and SN respectively. Red box indicates the section represented in Figures.

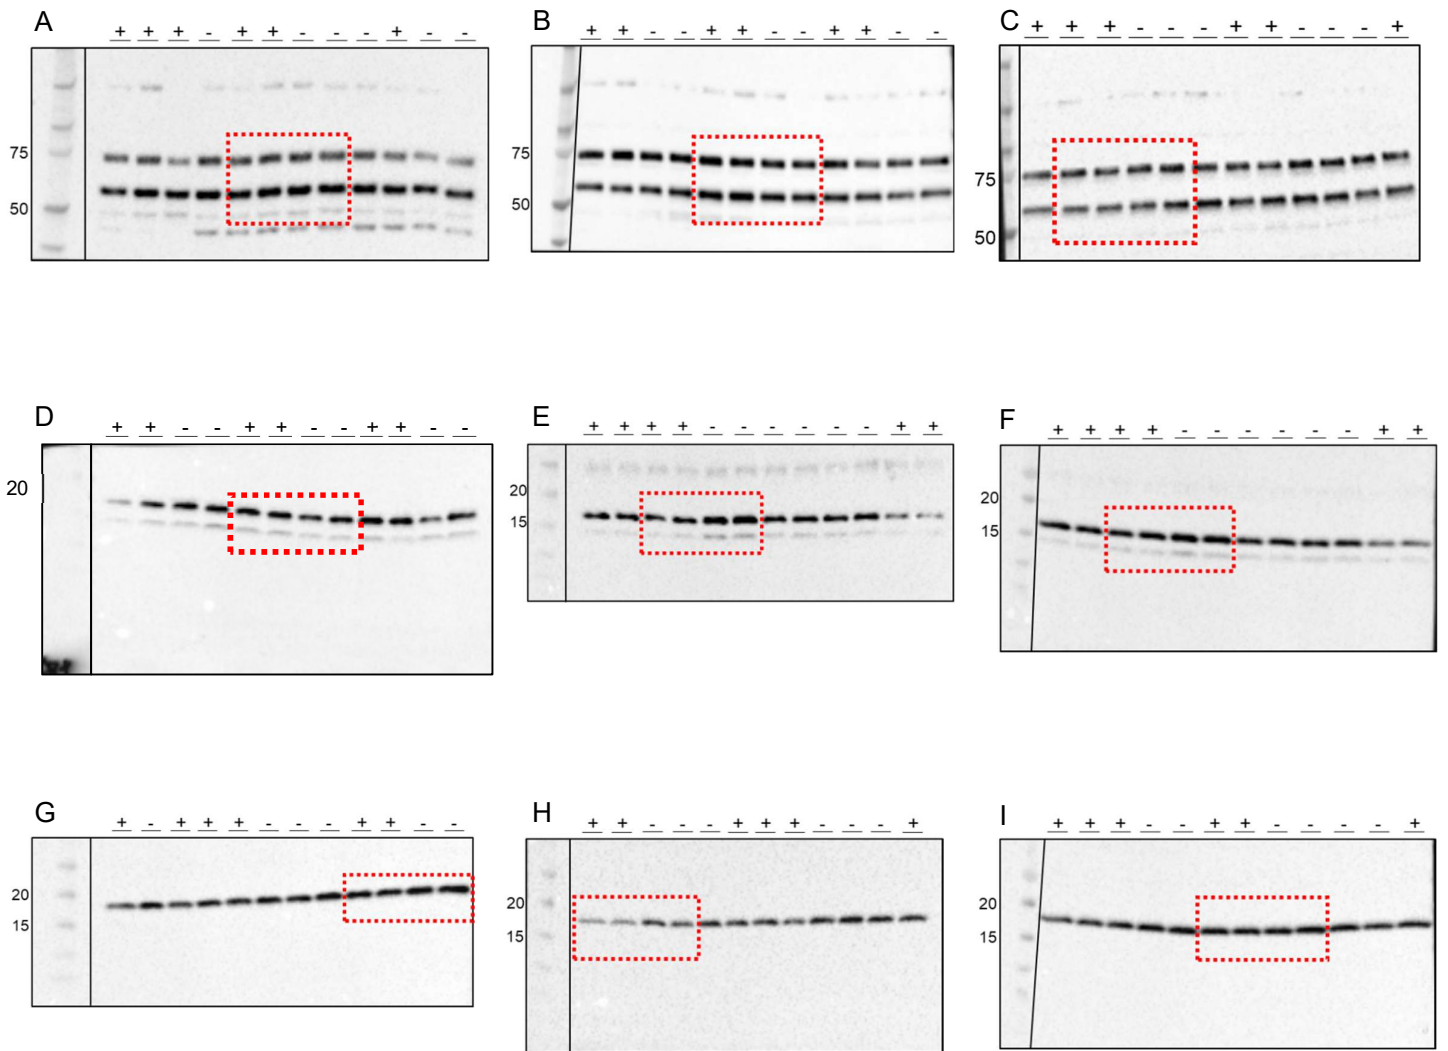

**Figure S4.** Full Western Blots of 15 mo WT (+) and  $Tau^{-/-}$  (-) cell lysate. A, B, C: immunoblot of p62 from OB, CPU and SN respectively. D, E, F: immunoblot of LCB3 from OB, CPU and SN respectively. G, H, I: immunoblot of  $\alpha$ -synuclein from OB, CPU and SN respectively. Red box indicates the section represented in Figures.

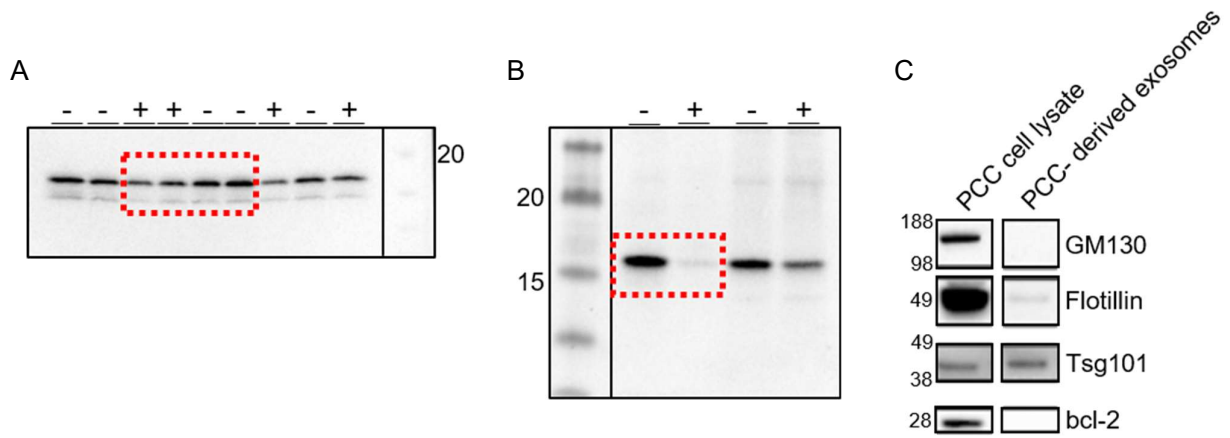

**Figure S5.** A) Full Western Blots of primary cortical neurons for LC3B from WT (+) and Tau<sup>-/-</sup> (-) cell lysate. B) Full Western Blot of primary cortical neuron-derived exosomes for α-synuclein from WT (+) and Tau<sup>-/-</sup> (-) cells. C) Exosome verification using exosome negative markers (GM130 & bcl-2), exosome positive marker (Tsg101) and microvesicle marker (Flotillin) in primary cortical neuron cell lysate and exosomes.
